# Supplementary material for: RGS10 deficiency facilitates distant metastasis by inducing epithelial–mesenchymal transition in breast cancer
Source: eLife journal article supplement (doi:10.7554/elife.97327), 2024-04-19

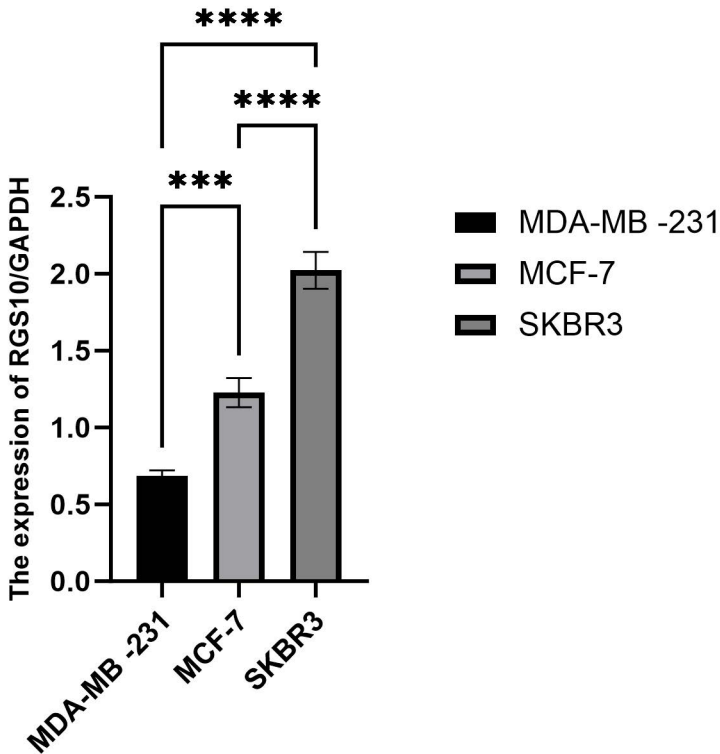

Supplement: fig2-data3 [file elife-97327-fig2-data3-v1.pdf]
