# Supplementary material for: RGS10 deficiency facilitates distant metastasis by inducing epithelial–mesenchymal transition in breast cancer
Source: eLife journal article supplement (doi:10.7554/elife.97327), 2024-04-19
Supplement: fig4-data3 [file elife-97327-fig4-data3-v1.pdf]

The expression of RGS10/ $\beta$ -Tubulin

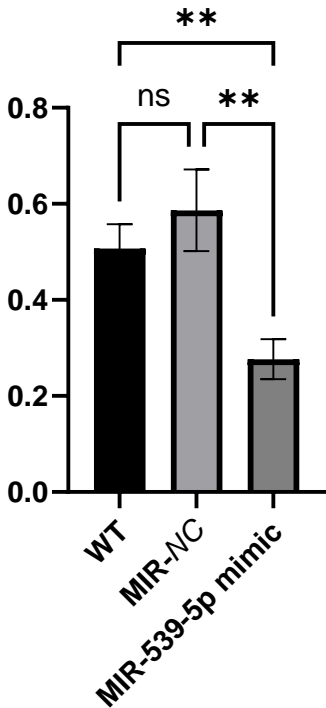

- WT
- MIR-NC
- MIR-539-5p mimic
