# Supplementary material for: RGS10 deficiency facilitates distant metastasis by inducing epithelial–mesenchymal transition in breast cancer
Source: eLife journal article supplement (doi:10.7554/elife.97327), 2024-04-19

LCN2/ $\beta$ -Tubulin

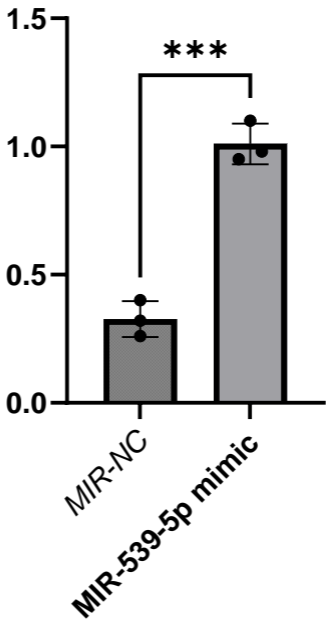

Supplement: fig4-data6 [file elife-97327-fig4-data6-v1.pdf]
