# Supplementary material for: RGS10 deficiency facilitates distant metastasis by inducing epithelial–mesenchymal transition in breast cancer
Source: eLife journal article supplement (doi:10.7554/elife.97327), 2024-04-19
Supplement: fig4-data7 [file F4D.xlsx]

## Sheet: 板 1 - Sheet1
		0H	WT	0.295	0.3	0.3	0.29	0.303	24H	0.37	0.36	0.363	0.369	0.394
			NC	0.308	0.29	0.284	0.287	0.296		0.399	0.375	0.396	0.409	0.418
			539	0.345	0.37	0.341	0.33	0.328		0.481	0.516	0.475	0.492	0.497
			减空白孔	#DIV/0!					AVG	blank	0.245				AVG
				0.0724	0.0774	0.0774	0.0674	0.0804	0.075	0.125	0.115	0.118	0.124	0.149	0.1262
				0.0854	0.0674	0.0614	0.0644	0.0734	0.0704	0.154	0.13	0.151	0.164	0.173	0.1544
				0.1224	0.1474	0.1184	0.1074	0.1054	0.1202	0.236	0.271	0.23	0.247	0.252	0.2472
		48H	WT	0.368	0.535	0.369	0.383	0.331	72H	0.442	0.427	0.462	0.444	0.505
			NC	0.441	0.432	0.429	0.418	0.402		0.436	0.467	0.407	0.493	0.516
			539	0.578	0.539	0.563	0.592	0.605		0.677	0.664	0.638	0.68	0.741
			629	0.632	0.652	0.63	0.659	0.667		0.757	0.721	0.75	0.804	0.824
			blank	0.221					AVG	blank	0.25				AVG
				0.147	0.314	0.148	0.162	0.11	0.1762	0.192	0.177	0.212	0.194	0.255	0.206
				0.22	0.211	0.208	0.197	0.181	0.2034	0.186	0.217	0.157	0.243	0.266	0.2138
				0.357	0.318	0.342	0.371	0.384	0.3544	0.427	0.414	0.388	0.43	0.491	0.43
