# Supplementary material for: RGS10 deficiency facilitates distant metastasis by inducing epithelial–mesenchymal transition in breast cancer
Source: eLife journal article supplement (doi:10.7554/elife.97327), 2024-04-19

The expression of RGS10/GAPDH

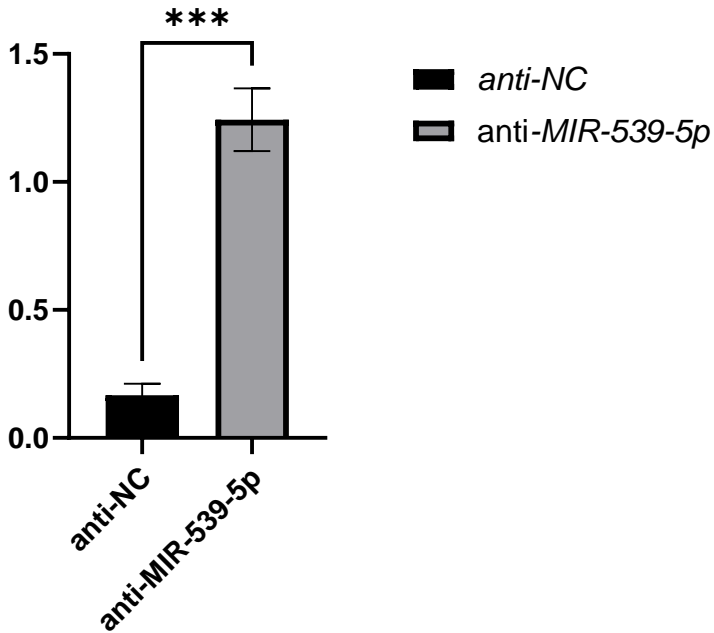

Supplement: fig5-data3 [file elife-97327-fig5-data3-v1.pdf]
