# Supplementary material for: RGS10 deficiency facilitates distant metastasis by inducing epithelial–mesenchymal transition in breast cancer
Source: eLife journal article supplement (doi:10.7554/elife.97327), 2024-04-19
Supplement: fig5-data7 [file F5A.xlsx]

## Sheet: Sheet1
A01	SYBR	GAPDH	Unkn	anti-miR-539-5p	13.6529	13.6529	0
A02	SYBR	GAPDH	Unkn	anti-miR-539-5p	13.8542	13.8542	0
A03	SYBR	GAPDH	Unkn	anti-miR-539-5p	14.125	14.125	0
A04	SYBR	miR-539-5P	Unkn	anti-miR-539-5p	25.7584	25.7584	0
A05	SYBR	miR-539-5P	Unkn	anti-miR-539-5p	26.9842	26.9842	0
A06	SYBR	miR-539-5P	Unkn	anti-miR-539-5p	26.3327	26.3327	0
B01	SYBR	GAPDH	Unkn	anti-NC	13.6485	13.6485	0
B02	SYBR	GAPDH	Unkn	anti-NC	14.221	14.221	0
B03	SYBR	GAPDH	Unkn	anti-NC	13.247	13.247	0
B05	SYBR	miR-539-5P	Unkn	anti-NC	20.9563	20.9563	0
B06	SYBR	miR-539-5P	Unkn	anti-NC	20.3327	20.3327	0
B07	SYBR	miR-539-5P	Unkn	anti-NC	21.8745	21.8745	0
C01	SYBR	GAPDH	Unkn	WT	13.6325	13.6325	0
C02	SYBR	GAPDH	Unkn	WT	14.3626	14.3626	0
C03	SYBR	GAPDH	Unkn	WT	13.509	13.509	0
C04	SYBR	miR-539-5P	Unkn	WT	20.6255	20.6255	0
C05	SYBR	miR-539-5P	Unkn	WT	21.9058	21.9058	0
C06	SYBR	miR-539-5P	Unkn	WT	20.5847	20.5847	0
	V	AVG	F2	ΔCT		ΔΔCT	2-ΔΔCt
WT	13.6325	13.8347	20.6255	6.79079	6.87065	-0.0798582	1.05691
	14.3626		20.9058	7.07113		0.200484	0.870258
	13.509		20.5847	6.75002		-0.120626	1.08721
anti-NC	13.6485	13.7055	20.4563	6.75075		-0.119899	1.08666
	14.221		20.6327	6.92715		0.0565053	0.961591
	13.247		20.2745	6.56901		-0.301641	1.23255
anti-miR-539-5p	13.6529	13.8774	22.4584	8.58106		1.71041	0.305573
	13.8542		22.6842	8.80686		1.93621	0.261301
	14.125		22.3327	8.45534		1.58469	0.333395
