# Supplementary material for: RGS10 deficiency facilitates distant metastasis by inducing epithelial–mesenchymal transition in breast cancer
Source: eLife journal article supplement (doi:10.7554/elife.97327), 2024-04-19
Supplement: fig5-data7 [file F5B-RGS10-antiPCR.xls]

## Sheet: 0
	Well	Fluor	Target	Content	Sample	Biological Set Name	Cq	Cq Mean	Cq Std. Dev	Starting Quantity (SQ)	Log Starting Quantity	SQ Mean	SQ Std. Dev	Set Point	Well Note
	A01	SYBR	U6	Unkn	anti-miR-539-5p		11.3067	11.3067	0				0	55
	A02	SYBR	U6	Unkn	anti-miR-539-5p		11.033	11.033	0				0	55
	A03	SYBR	U6	Unkn	anti-miR-539-5p		10.3976	10.3976	0				0	55
	A04	SYBR	RGS10	Unkn	anti-miR-539-5p		14.8264	15.8264	0				0	55
	A05	SYBR	RGS10	Unkn	anti-miR-539-5p		14.6004	15.6004	0				0	55
	A06	SYBR	RGS10	Unkn	anti-miR-539-5p		14.4198	15.4198	0				0	55
	A08	SYBR	330	Unkn	NC		16.9913	16.9913	0				0	55
	A09	SYBR	330	Unkn	NC		16.8111	16.8111	0				0	55
	B01	SYBR	U6	Unkn	anti-NC		11.0655	11.0655	0				0	55
	B02	SYBR	U6	Unkn	anti-NC		11.9537	11.9537	0				0	55
	B03	SYBR	U6	Unkn	anti-NC		10.868	10.868	0				0	55
	B05	SYBR	RGS10	Unkn	anti-NC		16.5945	16.5945	0				0	55
	B06	SYBR	RGS10	Unkn	anti-NC		16.742	16.742	0				0	55
	B08	SYBR	330	Unkn	mir-330		14.1098	14.1098	0				0	55
	B09	SYBR	330	Unkn	mir-330		14.4985	14.4985	0				0	55
	C01	SYBR	U6	Unkn	mir-330		9.80573	9.80573	0				0	55
	C02	SYBR	U6	Unkn	mir-330		10.0913	10.0913	0				0	55
	C03	SYBR	U6	Unkn	mir-330		10.0725	10.0725	0				0	55
	C04	SYBR	RGS10	Unkn	mir-330		16.5566	16.5566	0				0	55
	C05	SYBR	RGS10	Unkn	mir-330		15.4537	15.4537	0				0	55
	C06	SYBR	RGS10	Unkn	mir-330		15.8181	15.8181	0				0	55
	C10	SYBR	671	Unkn	NC		15.0388	15.0388	0				0	55
	C12	SYBR	671	Unkn	NC		15.038	15.038	0				0	55
	D11	SYBR	671	Unkn	mir-671		12.8662	12.8662	0				0	55
	D12	SYBR	671	Unkn	mir-671		12.7397	12.7397	0				0	55
	E02	SYBR	U6	Unkn	mir-516		9.44358	9.44358	0				0	55
	E03	SYBR	U6	Unkn	mir-516		9.11294	9.11294	0				0	55
	E04	SYBR	RGS10	Unkn	mir-516		15.1799	15.1799	0				0	55
	E06	SYBR	RGS10	Unkn	mir-516		15.3465	15.3465	0				0	55
	E07	SYBR	516	Unkn	NC		17.0256	17.0256	0				0	55
	E09	SYBR	516	Unkn	NC		17.3324	17.3324	0				0	55
	F08	SYBR	516	Unkn	mir-516		14.3503	14.3503	0				0	55
	F09	SYBR	516	Unkn	mir-516		14.6771	14.6771	0				0	55
	G01	SYBR	U6	Unkn	mir-629		11.1145	11.1145	0				0	55
	G02	SYBR	U6	Unkn	mir-629		10.492	10.492	0				0	55
	G03	SYBR	U6	Unkn	mir-629		10.4947	10.4947	0				0	55
	G04	SYBR	RGS10	Unkn	mir-629		15.0704	15.0704	0				0	55
	G05	SYBR	RGS10	Unkn	mir-629		15.2699	15.2699	0				0	55
	G06	SYBR	RGS10	Unkn	mir-629		15.2767	15.2767	0				0	55
	H01	SYBR	U6	Unkn	mir-671		12.1597	12.1597	0				0	55
	H03	SYBR	U6	Unkn	mir-671		12.069	12.069	0				0	55
	H05	SYBR	RGS10	Unkn	mir-671		14.3803	14.3803	0				0	55
	H06	SYBR	RGS10	Unkn	mir-671		14.667	14.667	0				0	55
							16.66
	B07	SYBR	RGS10	Unkn	anti-NC		16.662	16.662	0
	C01	SYBR	U6	Unkn	WT		11.1427	11.1427	0
	C02	SYBR	U6	Unkn	WT		11.6586	11.6586	0
	C03	SYBR	U6	Unkn	WT		10.6634	10.6634	0
	C04	SYBR	RGS10	Unkn	WT		16.9584	16.9584	0
	C05	SYBR	RGS10	Unkn	WT		16.5563	16.5563	0
	C06	SYBR	RGS10	Unkn	WT		16.4488	16.4488	0
			内参	avg	F2		ΔCT		ΔΔCT							2-ΔΔCt
		WT	11.1427
			11.6586	=AVERAGE(D54:D56)
			10.6634
				=AVERAGE(D54:D56)

## Sheet: Run Information
File Name	admin_2022-07-12 10-51-50_CT028769.pcrd
Created By User	admin
Notes
ID
Run Started	07/12/2022 02:52:09 UTC
Run Ended	07/12/2022 03:52:41 UTC
Sample Vol	25
Lid Temp	105
Protocol File Name	220712.prcl
Plate Setup File Name	22.6.29.pltd
Base Serial Number	CT028769
Optical Head Serial Number	785BR17163
CFX Manager Version	3.1.1517.0823.

## Sheet: Sheet1
Well	Fluor	Target	Content	Sample	Cq	Cq Mean	Cq Std. Dev
A01	SYBR	GAPDH	Unkn	anti-miR-539-5p	11.3067	11.3067	0
A02	SYBR	GAPDH	Unkn	anti-miR-539-5p	11.033	11.033	0
A03	SYBR	GAPDH	Unkn	anti-miR-539-5p	10.3976	10.3976	0
A04	SYBR	RGS10	Unkn	anti-miR-539-5p	14.8264	15.8264	0
A05	SYBR	RGS10	Unkn	anti-miR-539-5p	14.6004	15.6004	0
A06	SYBR	RGS10	Unkn	anti-miR-539-5p	14.4198	15.4198	0
B01	SYBR	GAPDH	Unkn	anti-NC	11.0655	11.0655	0
B02	SYBR	GAPDH	Unkn	anti-NC	11.9537	11.9537	0
B03	SYBR	GAPDH	Unkn	anti-NC	10.868	10.868	0
B05	SYBR	RGS10	Unkn	anti-NC	16.5945	16.5945	0
B06	SYBR	RGS10	Unkn	anti-NC	16.742	16.742	0
B07	SYBR	RGS10	Unkn	anti-NC	16.662	16.662	0
C01	SYBR	GAPDH	Unkn	WT	11.1427	11.1427	0
C02	SYBR	GAPDH	Unkn	WT	11.6586	11.6586	0
C03	SYBR	GAPDH	Unkn	WT	10.6634	10.6634	0
C04	SYBR	RGS10	Unkn	WT	16.9584	16.9584	0
C05	SYBR	RGS10	Unkn	WT	16.5563	16.5563	0
C06	SYBR	RGS10	Unkn	WT	16.4488	16.4488	0
	V	AVG	F2	ΔCT		ΔΔCT	2-ΔΔCt
WT	11.1427	11.1549	16.9584	5.80353	5.4996	0.303931	0.810042
	11.6586		16.5563	5.40139		-0.0982116	1.07045
	10.6634		16.4488	5.29388		-0.205719	1.15326
anti-NC	11.0655	11.2957	16.5945	5.29883		-0.200772	1.14931
	11.9537		16.742	5.44627		-0.0533307	1.03766
	10.868		16.662	5.36634		-0.133264	1.09677
anti-miR-539-5p	11.3067	10.9132	14.8264	3.91311		-1.58649	3.00318
	11.033		14.6004	3.68716		-1.81244	3.51236
	10.4		14.4198	3.50656		-1.99304	3.98076
