# Supplementary material for: RGS10 deficiency facilitates distant metastasis by inducing epithelial–mesenchymal transition in breast cancer
Source: eLife journal article supplement (doi:10.7554/elife.97327), 2024-04-19
Supplement: fig5-data7 [file F5D-inhibitor.xlsx]

## Sheet: 板 1 - Sheet1
		0H	WT	0.289	0.28	0.277	0.284	0.284	0.269	24H	WT	0.361	0.358	0.352	0.353	0.353	0.353
			NC	0.269	0.269	0.268	0.272	0.27	0.273		NC	0.356	0.354	0.35	0.362	0.353	0.349
			539	0.291	0.289	0.287	0.289	0.293	0.282		539	0.333	0.325	0.327	0.331	0.34	0.336
			blank	#DIV/0!							blank	0.208
				0.101	0.092	0.089	0.096	0.096	0.081	0.0925		0.153	0.15	0.144	0.145	0.145	0.145	0.147
				0.081	0.081	0.08	0.084	0.082	0.085	0.0821667		0.148	0.146	0.142	0.154	0.145	0.141	0.146
				0.103	0.101	0.099	0.101	0.105	0.094	0.1005		0.125	0.117	0.119	0.123	0.132	0.128	0.124
		48H	WT	0.432	0.428	0.457	0.435	0.444	0.447	72H	WT	0.633	0.645	0.629	0.635	0.641	0.636
			NC	0.4	0.423	0.427	0.416	0.412	0.415		NC	0.629	0.639	0.635	0.637	0.646	0.633
			539	0.367	0.364	0.361	0.366	0.361	0.368		539	0.532	0.541	0.545	0.55	0.548	0.543
			blank	0.193							blank	0.256
				0.239	0.235	0.264	0.242	0.251	0.254	0.2475		0.377	0.389	0.373	0.379	0.385	0.38	0.3805
				0.207	0.23	0.234	0.223	0.219	0.222	0.2225		0.373	0.383	0.379	0.381	0.39	0.377	0.3805
				0.174	0.171	0.168	0.173	0.168	0.175	0.1715		0.276	0.285	0.289	0.294	0.292	0.287	0.287167
