# Supplementary material for: RGS10 deficiency facilitates distant metastasis by inducing epithelial–mesenchymal transition in breast cancer
Source: eLife journal article supplement (doi:10.7554/elife.97327), 2024-04-19
Supplement: fig6-data2 [file F6B-volume of tumor.xlsx]

## Sheet: Sheet1
		WT	width	0.72	0.66	0.9	0.57	0.59
			length	0.54	0.63	0.44	0.55	0.5
			volume	139.968	137.214	178.2	89.347	87.025
		NC	width	0.58	0.71	0.92	0.67	0.63
			length	0.54	0.65	0.47	0.49	0.61
			volume	90.828	163.832	198.904	109.981	121.055
		sh-RGS10	width	0.95	1.01	0.93	1.17	0.9
			length	1.06	1.28	1.47	1.08	1.39
			volume	478.325	652.864	635.701	739.206	625.5
