# Supplementary figures and images for: RGS10 deficiency facilitates distant metastasis by inducing epithelial–mesenchymal transition in breast cancer
Source: eLife journal article supplement (doi:10.7554/elife.97327), 2024-04-19

# EnhancedVolcano

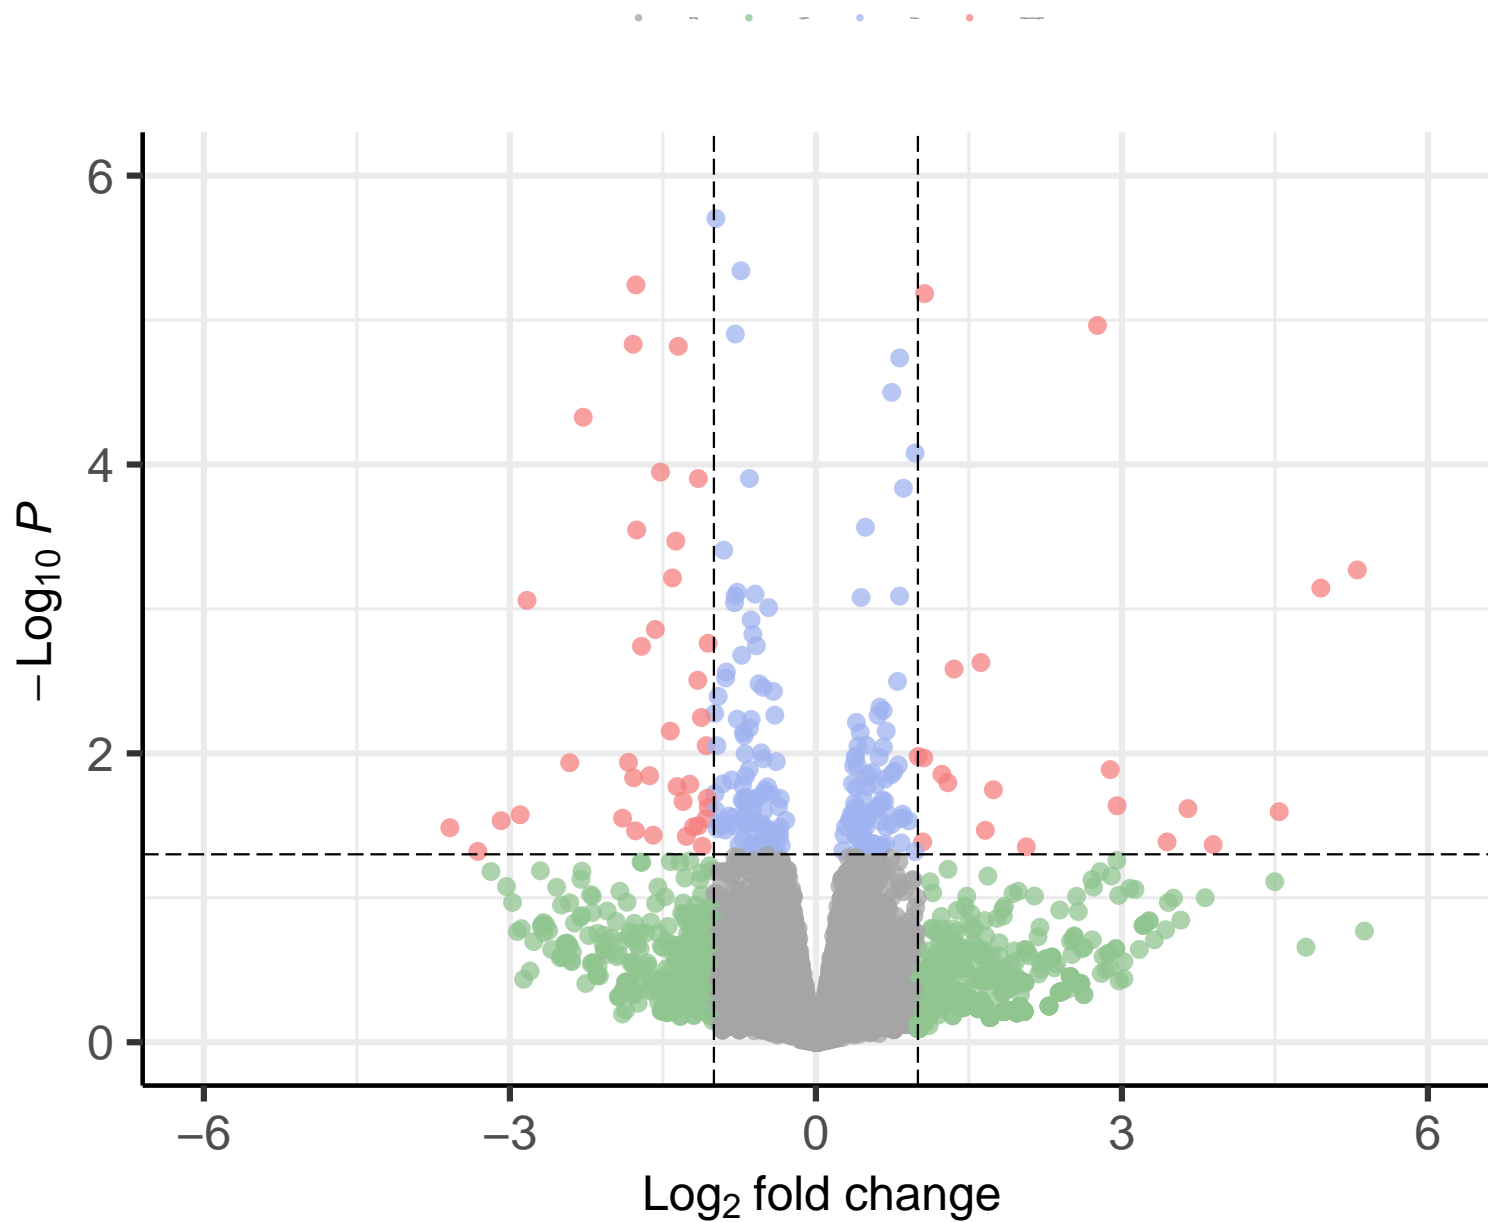

total = 15642 variables

Supplement: fig3-data4 [file F3A.pdf › Figure 3-Source data 4/F3A.pdf]
